# Supplementary material for: Trends in Food Consumption Patterns of US Infants and Toddlers from Feeding Infants and Toddlers Studies (FITS) in 2002, 2008, 2016
Source: PubMed Central journal article supplement (PMC6893614; doi:10.3390/nu11112807), 2019-11-17
Supplement: nutrients-11-02807-s001.pdf [file nutrients-11-02807-s001.pdf]

**Supplementary Materials for  
Trends in Food Consumption Patterns of US Infants and Toddlers from Feeding Infants and  
Toddlers Studies (FITS) in 2002, 2008, 2016  
Duffy, Kay, Jacquier, Catellier, Hampton, Anater, and Story**

**Table S1.** Grams per consumer for all food and beverage categories among 6-11.9 month olds and 12-23.9 month olds across FITS 2002, 2008, and 2016.

| Food                                                                             | 6-11.9 mos |         |      |              | 12-23.9 mos |      |      |              |
|----------------------------------------------------------------------------------|------------|---------|------|--------------|-------------|------|------|--------------|
|                                                                                  | 2002       | 2008    | 2016 | Linear Trend | 2002        | 2008 | 2016 | Linear Trend |
| <b>All Milk and Milk Products<sup>1</sup></b>                                    | 727        | 734     | 810  | NA           | 613         | 531  | 513  | NA           |
| Breast Milk                                                                      | 585        | 574     | 565  | 0.2367       | 436         | 283  | 320  | 0.0092       |
| Formula                                                                          | 670        | 720     | 818  | <0.0001      | 468         | 503  | 501  | 0.5231       |
| Milk (any) <sup>2</sup>                                                          | 395        | 292     | 360  | 0.7201       | 559         | 489  | 461  | <0.0001      |
| Cow's milk <sup>3</sup>                                                          | 386        | 294     | 364  | 0.8634       | 555         | 488  | 464  | <0.0001      |
| Whole milk <sup>4</sup>                                                          | 420        | 327     | 476  | 0.5264       | 536         | 489  | 468  | 0.0006       |
| Reduced fat (2%) milk <sup>4</sup>                                               | 314        | 230     | 220  | NA           | 519         | 405  | 360  | 0.0001       |
| Low- or nonfat milk <sup>4</sup>                                                 | 57         | 86      | 78   | NA           | 361         | 397  | 297  | 0.2184       |
| Flavored milk                                                                    | 141        | 46      | 146  | NA           | 312         | 283  | 239  | 0.1613       |
| Toddler milk                                                                     | 56         | missing | 183  | NA           | 110         | 708  | 141  | NA           |
| <b>Cheese</b>                                                                    | 22         | 20      | 19   | 0.3293       | 31          | 30   | 26   | 0.0385       |
| <b>Yogurt</b>                                                                    | 89         | 101     | 95   | 0.5672       | 117         | 113  | 119  | 0.6586       |
| <b>All grain<sup>1</sup></b>                                                     | 62         | 58      | 50   | 0.0033       | 91          | 89   | 99   | 0.0943       |
| Bread, rolls, biscuits, bagels, & tortillas                                      | 20         | 27      | 20   | 0.8254       | 28          | 31   | 36   | <0.0001      |
| Bread                                                                            | 22         | 24      | 20   | 0.6531       | 25          | 29   | 33   | <0.0001      |
| Crackers, pretzels, & rice cakes                                                 | 10         | 12      | 12   | 0.2039       | 15          | 17   | 21   | 0.0001       |
| Crackers                                                                         | 10         | 11      | 12   | 0.2634       | 14          | 17   | 20   | 0.0001       |
| Pancakes, waffles, & French toast                                                | 29         | 29      | 30   | NA           | 52          | 42   | 53   | 0.6272       |
| Pancakes                                                                         | 31         | 25      | 33   | NA           | 59          | 36   | 57   | 0.8198       |
| Pasta & rice                                                                     | 48         | 79      | 51   | 0.9153       | 79          | 68   | 80   | 0.7720       |
| Pasta                                                                            | 60         | 40      | 51   | NA           | 81          | 65   | 81   | 0.6625       |
| Infant cereal <sup>5</sup>                                                       | 54         | 36      | 41   | 0.0020       | 46          | 42   | 58   | 0.1685       |
| Family cereal <sup>6</sup>                                                       | 22         | 56      | 39   | 0.0060       | 44          | 52   | 61   | 0.0020       |
| Baby finger foods <sup>7</sup>                                                   | 7          | 6       | 5    | 0.0145       | 9           | 13   | 7    | 0.0099       |
| <b>Whole grains (any)<sup>8</sup></b>                                            | —          | 46      | 43   | 0.7506       | —           | 52   | 73   | 0.0007       |
| <b>Any Fruit<sup>1</sup> or 100% Fruit Juice</b>                                 | 195        | 154     | 168  | 0.0039       | 301         | 283  | 267  | 0.0044       |
| 100% juice <sup>9</sup>                                                          | 150        | 126     | 140  | 0.4285       | 260         | 253  | 219  | 0.0030       |
| All fruits (excluding 100% fruit juice) <sup>10</sup>                            | 129        | 119     | 126  | 0.5730       | 149         | 148  | 166  | 0.0176       |
| Baby food fruit <sup>11</sup>                                                    | 124        | 113     | 120  | 0.4569       | 120         | 119  | 120  | 0.9272       |
| <b>Any vegetable<sup>1, 12</sup></b>                                             | 103        | 111     | 104  | 0.9107       | 87          | 90   | 88   | 0.8760       |
| Baby-food vegetables <sup>13</sup>                                               | 113        | 119     | 113  | 0.9565       | 121         | 136  | 103  | 0.1227       |
| Non baby-food vegetables <sup>14</sup>                                           | 56         | 76      | 57   | 0.5375       | 62          | 66   | 65   | 0.4690       |
| White potatoes <sup>15</sup>                                                     | 40         | 59      | 50   | 0.1689       | 56          | 59   | 60   | 0.4266       |
| Fried potatoes <sup>16</sup>                                                     | 27         | 22      | 23   | NA           | 41          | 33   | 40   | 0.8158       |
| <b>Any meat or other protein food (excludes cheese &amp; yogurt)<sup>1</sup></b> | 45         | 66      | 50   | 0.9356       | 72          | 77   | 88   | <0.0001      |
| Baby-food meats <sup>17</sup>                                                    | 54         | 55      | 48   | NA           | 47          | 52   | 63   | NA           |
| Non baby-food meats <sup>18</sup>                                                | 33         | 65      | 39   | 0.8832       | 56          | 55   | 63   | 0.0259       |
| Other protein sources <sup>19</sup>                                              | 42         | 30      | 40   | 0.8465       | 49          | 62   | 62   | 0.0041       |
| <b>Any sweets or sugar-sweetened beverages</b>                                   | 78         | 86      | 48   | 0.0001       | 180         | 138  | 121  | <0.0001      |

|                                         |           |          |           |           |           |           |           |               |
|-----------------------------------------|-----------|----------|-----------|-----------|-----------|-----------|-----------|---------------|
| All sweets <sup>20</sup>                | 57        | 49       | 20        | <0.0001   | 53        | 54        | 43        | 0.0065        |
| Sugar-sweetened beverages <sup>21</sup> | 136       | 269      | 134       | NA        | 291       | 222       | 221       | 0.0023        |
| Soft drinks                             | 40        | 109      | 1         | NA        | 132       | 112       | 97        | NA            |
| Fruit-flavored drinks                   | 125       | 320      | 139       | NA        | 288       | 228       | 226       | 0.0164        |
| Sports' drinks                          | 299       | —        | 153       | NA        | 169       | 167       | 170       | NA            |
| <b>Savory Snacks<sup>22</sup></b>       | <b>10</b> | <b>5</b> | <b>15</b> | <b>NA</b> | <b>14</b> | <b>15</b> | <b>19</b> | <b>0.0368</b> |

NA = p-value suppressed because it was based on an insufficient number of observations (fewer than 30 consumers or fewer than 30 non-consumers).

— = category not reported for that FITS year.

<sup>1</sup> Excludes foods in mixed dishes.

<sup>2</sup> Includes all milks except breastmilk and infant formula.

<sup>3</sup> Includes all fat levels, as well as flavored, unflavored, or powdered.

<sup>4</sup> Includes only unflavored cow's milk of specified fat level, excludes flavored and powdered.

<sup>5</sup> Includes any kind of baby-food cereal, regardless of grain (i.e., rice, oat, quinoa, wheat, multigrain, or unknown grain).

<sup>6</sup> Includes any ready-to-eat or hot cereal that is not infant cereal.

<sup>7</sup> Includes pretzels, crackers, rice cakes, and baby-food puffs.

<sup>8</sup> Includes products that are ≥50% whole grain. Whole grain intake was not assessed in 2002.

<sup>9</sup> Includes any 100% fruit juice regardless of whether it is specifically labeled for babies or not. Beverages that are <100% fruit juice are included in sugar sweetened beverages.

<sup>10</sup> Includes commercial and homemade pureed baby-food fruit and non-baby-food fruit; excludes 100% juice.

<sup>11</sup> Includes commercial and homemade pureed baby-food fruit, excludes 100% juice.

<sup>12</sup> Includes any vegetable, including white potatoes, whether baby food or not.

<sup>13</sup> Includes commercial and homemade pureed baby-food vegetables.

<sup>14</sup> Includes non-baby-food dark green, orange, red, starchy, and other vegetables; excludes baby food and white potatoes.

<sup>15</sup> Includes fried potatoes, mashed potatoes and mixtures, and baked potatoes.

<sup>16</sup> Includes French fries and any other kind of fried potatoes.

<sup>17</sup> Includes commercial and homemade pureed baby-food meats.

<sup>18</sup> Includes beef; chicken or turkey; fish or shellfish; hotdogs, sausages, bacon, cold cuts; pork/ham; lamb; goat; game; and organ meats.

<sup>19</sup> Includes dried beans and legumes; eggs; vegetarian meat substitutes; nuts, nut butters, and seeds; excludes cheese and yogurt; those are reported in Table 2 with dairy products.

<sup>20</sup> Includes sweet baked goods, cereal and nutrition bars, candy, ice cream and other frozen desserts, jellies and jams, milk flavorings, and baby-food desserts and cookies.

<sup>21</sup> Includes soft drinks, fruit-flavored drinks, tea and coffee, and sports drinks. Excludes 100% fruit juice, which is reported in Table 4 with fruits and 100% fruit juices.

<sup>22</sup> Includes chips, corn chips, popcorn, snack mix, and puffs (non-babyfood).
